# Supplementary material for: Interstitial Lung Abnormalities Detected by CT in Asbestos-Exposed Subjects Are More Likely Associated to Age
Source: MDPI journal article supplement (doi:10.3390/jcm10143130), 2021-07-15
Supplement: s1 [file s1]

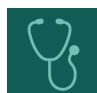

## Supplementary Materials

**Table S1.** Association between the presence of UIP pattern (definite, possible UIP pattern) and interstitial pattern inconsistent with UIP pattern at CT and asbestos exposure, age, and smoking status.

|                                                       | Univariate Model        | Multivariate Models     |                         |
|-------------------------------------------------------|-------------------------|-------------------------|-------------------------|
|                                                       | OR (IC95 %)             | OR (IC95%)              | OR (IC95%)              |
| <b>Duration of exposure (year)</b>                    | 1.01 (0.99-1.02)        | -                       | -                       |
| <b>Time since the first exposure (year)</b>           | <b>1.05 (1.02-1.07)</b> | 1.00 (0.97-1.03)        | 1.00 (0.97-1.03)        |
| <b>Maximum level of exposure</b>                      |                         |                         |                         |
| Low + low intermediate (n=605)                        | 1                       | -                       | 1                       |
| Intermediate high (n=1030)                            | 0.95 (0.62-1.45)        | -                       | 0.95 (0.62-1.46)        |
| High (n=522)                                          | 1.27 (0.80-2.02)        |                         | 1.27 (0.79-2.03)        |
| <b>CEI to asbestos (100units of exposure x years)</b> | 1.06 (0.90-1.26)        | 1.05 (0.89-1.24)        | -                       |
| <b>Age at the time of CT examination (year)</b>       | <b>1.09 (1.06-1.12)</b> | <b>1.09 (1.05-1.13)</b> | <b>1.09 (1.05-1.13)</b> |
| <b>Smoking status</b>                                 |                         |                         |                         |
| Non-smoker (n=619)                                    | 1                       | 1                       | 1                       |
| Ex-smoker (n=1412)                                    | 1.43 (0.94-2.16)        | 1.37 (0.90-2.09)        | 1.34 (0.88-2.05)        |
| Smoker (n=126)                                        | 1.11 (0.48-2.59)        | 1.38 (0.59-3.24)        | 1.35 (0.57-3.16)        |

CEI: cumulative exposure index to asbestos. Bold values indicate statistical significance.

**Table S2.** Association between emphysema at CT and asbestos exposure, age, and smoking status.

|                                                       | Unadjusted OR (IC95 %)  | Adjusted OR (IC95%)     |
|-------------------------------------------------------|-------------------------|-------------------------|
| <b>Duration of exposure (years)</b>                   | 0.99 (0.98-1.00)        | -                       |
| <b>Time since first exposure (years)</b>              | 1.00 (0.99-1.01)        | 1.00 (0.98-1.03)        |
| <b>Maximum level of exposure</b>                      |                         |                         |
| Low + low intermediate (n=605)                        | 1                       | 1                       |
| Intermediate high (n=1,030)                           | 1.25 (0.96-1.62)        | 1.23 (0.94-1.60)        |
| High (n=522)                                          | <b>1.45 (1.08-1.94)</b> | 2.30 (0.96-1.76)        |
| <b>CEI to asbestos (100units of exposure x years)</b> | 1.04 (0.94-1.15)        | 0.89 (0.75-1.06)        |
| <b>Age (years)</b>                                    | 1.00 (0.98-1.02)        | 1.01 (0.98-1.03)        |
| <b>Smoking status</b>                                 |                         |                         |
| Non-smoker (n=619)                                    | 1                       | 1                       |
| Ex-smoker (n=1,412)                                   | <b>2.81 (2.10-3.76)</b> | <b>2.75 (2.05-3.69)</b> |
| Smoker (n=126)                                        | <b>5.63 (3.60-8.79)</b> | <b>5.72 (3.63-8.99)</b> |

CEI: cumulative exposure index to asbestos. Bold values indicate statistical significance.

**Table S3.** Most represented occupations (ISCO 68) in the general population ( $n=2,157$ ) and according interstitial abnormalities detected at CT.

|                                                                                                              | All Subjects<br>( $n=2,157$ ) |       | Absent or Grav-<br>ity-Dependant<br>Opacities<br>( $n=1,794$ ) |      | Minor Interstitial<br>Abnormalities<br>( $n=226$ ) |      | Interstitial Abnor-<br>malities Inconsistent<br>with UIP<br>( $n=82$ ) |     | UIP Pattern<br>or Possible<br>UIP Pattern<br>( $n=55$ ) |     |
|--------------------------------------------------------------------------------------------------------------|-------------------------------|-------|----------------------------------------------------------------|------|----------------------------------------------------|------|------------------------------------------------------------------------|-----|---------------------------------------------------------|-----|
|                                                                                                              | <i>n</i>                      | %     | <i>n</i>                                                       | %    | <i>n</i>                                           | %    | <i>n</i>                                                               | %   | <i>n</i>                                                | %   |
| 8-49 Machinery Fitters, Machine Assemblers and Precision-Instrument Makers [except Electrical] Not Elsewhere | 362                           | 100.0 | 306                                                            | 84.5 | 36                                                 | 10.0 | 13                                                                     | 3.6 | 7                                                       | 1.9 |
| 7-00 Production supervisors and general foremen                                                              | 330                           | 100.0 | 275                                                            | 83.4 | 35                                                 | 10.6 | 11                                                                     | 3.3 | 9                                                       | 2.7 |
| 8-43 Motor-Vehicle Mechanics                                                                                 | 260                           | 100.0 | 221                                                            | 85.0 | 29                                                 | 11.1 | 7                                                                      | 2.7 | 3                                                       | 1.2 |
| 8-71 Plumbers and Pipe Fitters                                                                               | 244                           | 100.0 | 190                                                            | 77.9 | 39                                                 | 16.0 | 10                                                                     | 4.1 | 5                                                       | 2.0 |
| 8-73 Sheet-Metal Workers                                                                                     | 241                           | 100.0 | 205                                                            | 85.1 | 25                                                 | 10.4 | 8                                                                      | 3.3 | 3                                                       | 1.2 |
| 9-99 Labourers not elsewhere classified                                                                      | 232                           | 100.0 | 190                                                            | 81.9 | 26                                                 | 11.2 | 10                                                                     | 4.3 | 6                                                       | 2.6 |
| 8-55 Electrical Wiremen                                                                                      | 179                           | 100.0 | 151                                                            | 84.4 | 17                                                 | 9.5  | 7                                                                      | 3.9 | 4                                                       | 2.2 |
| 8-34 Machine-Tool Operators                                                                                  | 166                           | 100.0 | 135                                                            | 81.3 | 20                                                 | 12.1 | 6                                                                      | 3.6 | 5                                                       | 3.0 |
| 8-72 Welders and flame-Cutters                                                                               | 164                           | 100.0 | 134                                                            | 81.7 | 17                                                 | 10.4 | 7                                                                      | 4.2 | 6                                                       | 3.7 |
| 8-41 Machinery Fitters and Machine Assemblers                                                                | 163                           | 100.0 | 142                                                            | 87.1 | 14                                                 | 8.6  | 5                                                                      | 3.1 | 2                                                       | 1.2 |

**Table S4.** Most represented industries (ISIC Rev 2) in all subjects and according interstitial abnormalities detected at CT.

|                                                                                                         | All Subjects<br>( $n=2,157$ ) |       | Absent or Grav-<br>ity-Dependant<br>Opacities<br>( $n=1,794$ ) |      | Minor Interstitial<br>Abnormalities<br>( $n=226$ ) |      | Interstitial Abnor-<br>malities Inconsistent<br>with UIP<br>( $n=82$ ) |     | UIP Pattern<br>or Possible<br>UIP Pattern<br>( $n=55$ ) |     |
|---------------------------------------------------------------------------------------------------------|-------------------------------|-------|----------------------------------------------------------------|------|----------------------------------------------------|------|------------------------------------------------------------------------|-----|---------------------------------------------------------|-----|
|                                                                                                         | <i>n</i>                      | %     | <i>n</i>                                                       | %    | <i>n</i>                                           | %    | <i>n</i>                                                               | %   | <i>n</i>                                                | %   |
| 5000 Construction                                                                                       | 893                           | 100.0 | 731                                                            | 81.9 | 93                                                 | 10.4 | 45                                                                     | 5.0 | 24                                                      | 2.7 |
| 3710 Iron and steel basic industries                                                                    | 403                           | 100.0 | 328                                                            | 81.4 | 42                                                 | 10.4 | 25                                                                     | 6.2 | 8                                                       | 2.0 |
| 3813 Manufacture of structural metal products                                                           | 324                           | 100.0 | 265                                                            | 81.8 | 39                                                 | 12.0 | 12                                                                     | 3.7 | 8                                                       | 2.5 |
| 9513 Repair of motor vehicles and motorcycles                                                           | 274                           | 100.0 | 231                                                            | 84.3 | 31                                                 | 11.3 | 8                                                                      | 2.9 | 4                                                       | 1.5 |
| 3843 Manufacture of motor vehicles                                                                      | 211                           | 100.0 | 180                                                            | 85.3 | 17                                                 | 8.1  | 4                                                                      | 1.9 | 10                                                      | 4.7 |
| 3824 Manufacture of special industrial machinery and equipment [except metal and wood working machinery | 190                           | 100.0 | 159                                                            | 83.7 | 22                                                 | 11.6 | 5                                                                      | 2.6 | 4                                                       | 2.1 |
| 3841 Ship building and repairing                                                                        | 187                           | 100.0 | 155                                                            | 82.9 | 24                                                 | 12.8 | 5                                                                      | 2.7 | 3                                                       | 1.6 |
| 1110 Agriculture and livestock production                                                               | 130                           | 100.0 | 102                                                            | 78.5 | 15                                                 | 11.5 | 6                                                                      | 4.6 | 7                                                       | 5.4 |
| 6200 Retail Trade                                                                                       | 127                           | 100.0 | 106                                                            | 83.5 | 12                                                 | 9.5  | 4                                                                      | 3.1 | 5                                                       | 3.9 |
| 3699 Manufacture of non-metallic mineral products not elsewhere classifies                              | 109                           | 100.0 | 90                                                             | 82.6 | 11                                                 | 10.0 | 4                                                                      | 3.7 | 4                                                       | 3.7 |
